# Supplementary material
Source: MDPI journal article supplement (https://www.mdpi.com/2311-7524/10/5/459)
Supplement: s1 [file s1]

**Table S1.** Composition and aminogram of Tyson® protein hydrolysate.

| Composition      |        |
|------------------|--------|
| Total nitrogen   | 5.00%  |
| Organic nitrogen | 4.50%  |
| Organic carbon   | 25.00% |
| Free amino acids | 13.40% |
| Amino acids      | % W/W  |
| Alanine          | 0.83   |
| Arginine         | 0.11   |
| Aspartic acid    | 0.72   |
| Glutamic acid    | 7      |
| Glycine          | 0.05   |
| Lysine           | 0.05   |
| Methionine       | 0.05   |
| Phenylalanine    | 0.05   |
| Proline          | 3.21   |
| Tryptophan       | 1.25   |
| Valine           | 0.05   |

**Table S2.** Significance of the ANOVA for all recorded parameters.

| Parameters           | Genotype (G) | Biostimulant (B) | Year (Y) | G × B | G × Y | B × Y | G × B × Y |
|----------------------|--------------|------------------|----------|-------|-------|-------|-----------|
| Marketable yield     | ***          | ***              | NS       | NS    | NS    | NS    | NS        |
| Mean fruit weight    | *            | ***              | NS       | NS    | NS    | NS    | NS        |
| Fruit dry matter     | **           | ***              | NS       | NS    | NS    | NS    | NS        |
| Fruit firmness       | *            | ***              | NS       | NS    | NS    | NS    | NS        |
| TSS                  | ***          | ***              | NS       | NS    | NS    | NS    | NS        |
| Total sugars         | ***          | ***              | NS       | NS    | NS    | NS    | NS        |
| Ascorbic acid        | ***          | ***              | NS       | NS    | NS    | NS    | NS        |
| Flavonoids           | **           | ***              | NS       | NS    | NS    | NS    | NS        |
| Anthocyanins         | ***          | ***              | NS       | NS    | NS    | NS    | NS        |
| Total polyphenols    | ***          | ***              | NS       | ***   | NS    | NS    | NS        |
| Antioxidant activity | ***          | ***              | NS       | *     | NS    | NS    | NS        |

NS: not significant, \* significant at  $p \leq 0.05$ , \*\* significant at  $p \leq 0.01$ , \*\*\* significant at  $p \leq 0.001$
